# Supplementary material for: Densely accessible Fe/Co–Nx dual-atom site coupled core–shell Co3Fe7@C as an efficient bifunctional oxygen electrocatalyst for rechargeable zinc–air batteries
Source: Royal Society of Chemistry journal article supplement (doi:10.1039/d4ta02444c), 2024-01-01
Supplement: d4ta02444c1.pdf [file d4ta02444c1.pdf]

**Supporting Information**

**Densely Accessible Fe/Co-N<sub>x</sub> Dual-atom Sites Coupled Core-shell  
Co<sub>3</sub>Fe<sub>7</sub>@C as an Efficient Bifunctional Oxygen Electrocatalyst for  
Rechargeable Zinc-air Batteries**

Katam Srinivas<sup>a,1</sup>, Hesheng Yu<sup>a,1</sup>, Zhuo Chen<sup>b</sup>, Anran Chen<sup>c</sup>, Ming-qiang Zhu<sup>b,\*</sup>, Yuanfu  
Chen<sup>a,\*</sup>

<sup>a</sup> *School of Integrated Circuit Science and Engineering, and State Key Laboratory of  
Electronic Thin Films and Integrated Devices, University of Electronic Science and  
Technology of China, Chengdu 610054, Sichuan, China*

<sup>b</sup> *College of Mechanical and Electronic Engineering, Northwest A&F University,  
Yangling 712100, Shaanxi, China*

<sup>c</sup> *School of Materials and Energy, Yunnan University, Kunming 650091, Yunnan, China*

<sup>1</sup> These authors contributed equally to this work.

\*Corresponding authors.

*E-mail addresses:* zmqsx@nwsuaf.edu.cn (M.-q. Zhu), yfchen@uestc.edu.cn (Y. Chen).

## 1. Experimental Section

Absolute ethanol and the distilled water were used in washing the materials throughout the investigations.

### 1.2 Structural characterizations

Scanning electron microscope (SEM) images were carried out on a ZEISS Gemini 300. Transmission electron microscopy (TEM), high resolution TEM (HETEM), high angle annular dark field scanning transmission electron microscopy (HAADF-STEM), and element mapping analysis images were examined on a Talos F200X G2 with superX spectroscopy equipment. Aberration-corrected HAADF-STEM (AC HAADF-STEM) images were carried out on FEI-Themis Z. Notably, Fe<sub>3</sub>Co-NC@900 was washed with 1 M HNO<sub>3</sub> solution at 80 °C for 24 hours, followed by 1 M KOH wash at room temperature for 16 hours, in order to extensively eliminate the high magnetic Co<sub>3</sub>Fe<sub>7</sub> alloy particles prior to AC-HAADF-STEM test. X-ray diffraction (XRD) data were tested on a Rigaku Smartlab. Raman spectra data were measured on a Renishaw confocal microscope. X-ray photoelectron spectroscopy (XPS) data were obtained on a Thermo Scientific K-Alpha. N<sub>2</sub> adsorption/desorption isotherms (NADI) were obtained on a Micromeritics ASAP 2460 at 77 K. Inductively coupled plasma optical emission spectroscopy (ICP-OES) results were gained on a PE Avio 200.

### 1.3 Electrochemical characterizations

Electrochemical **ORR** measurements were carried out in O<sub>2</sub>- and N<sub>2</sub>-saturated 0.1 M KOH by using an electrochemical workstation (Pine, WaveDriver20) equipped with three

electrodes. Wherein the catalyst-loaded rotating disc electrode (RDE, Pine, 5 mm; for CV, LSV, CSCA, CV cycling,  $i-t$ , and methanol poisoning) and a rotating-ring disc electrode (RRDE, Pine,  $N = 0.37$ ; for electron transfer number and  $H_2O_2$  yield) were used as working electrodes, while the Hg/HgO electrode and Pt wire were used as the reference and counter electrodes, respectively.

Working electrodes were prepared by sonicating 5 mg of catalyst powder in 1 mL of mixed solvents ( $V_{\text{water}} : V_{\text{ethanol}} = 3: 1$ ) for 5 minutes. To which, 50  $\mu\text{L}$  of Nafion ink was injected and ultrasonicated for an additional 30 min. Afterwards, 15  $\mu\text{L}$  of catalyst ink was loaded on RDE and RRDE. The loading amounts of all the catalysts, including 20 wt.% Pt/C for ORR, were  $0.29 \text{ mg cm}^{-2}$ . All measured potentials were corrected versus the reversible hydrogen electrode (RHE) using the Nernst equation ( $E_{\text{RHE}} = E_{(\text{Hg}/\text{HgO})} + 0.0591 \times \text{pH} + 0.098$ ). The cyclic voltammetry (CV) curves were detected from 0.2 to 1.0 V on RDE ( $50 \text{ mV s}^{-1}$ ). The linear sweep voltammetry (LSV) curves were investigated from 0.2 to 1.1 V ( $10 \text{ mV s}^{-1}$ , 400-2500 rpm). Cyclic step chronoamperometry (CSCA) was conducted to measure the solution resistance by adding an instantaneous 50 mV step potential at 8 ms. The final LSV data was obtained by subtracting the background current measured in  $N_2$ -saturated electrolyte and performing  $iR$  compensation using the CSCA results. The CV cycling tests were carried out from 0.6 to 1.0 V for continuous 2,000 cycles ( $200 \text{ mV s}^{-1}$ ). The long-term durability experiments were executed by a chronoamperometry test on RDE at 0.6 V for 4,500 s (at 1600 rpm). Methanol tolerance tests were carried out by adding 20 mL of methanol to 80 mL of 0.1 M KOH electrolyte.

The Koutecky–Levich equation was provided to evaluate the values of electron transfer number ( $n$ ).

$$\frac{1}{j} = \frac{1}{j_d} + \frac{1}{j_k} = \frac{1}{B\omega^{1/2}} + \frac{1}{j_k}$$

$$B = 0.2nFC_0D^{2/3}V^{-1/6}$$

Wherein,  $j$ : measured current density;  $j_k$ : kinetic current density;  $j_d$ : diffusion-limited current density;  $\omega$ : the angular velocity of the disk ( $\text{rad s}^{-1}$ );  $F$ : Faraday constant ( $96485 \text{ C mol}^{-1}$ );  $C_0$ : bulk concentration of  $\text{O}_2$  ( $1.2 \times 10^{-6} \text{ mol cm}^{-3}$ );  $D_0$ : diffusion coefficient of  $\text{O}_2$  in  $0.1 \text{ M KOH}$  ( $1.9 \times 10^{-5} \text{ cm}^2 \text{ s}^{-1}$ );  $V$ : kinematic viscosity of the electrolyte ( $0.01 \text{ cm}^2 \text{ s}^{-1}$ ).

The  $\text{H}_2\text{O}_2$  yield and ' $n$ ' were further detected on RRDE. The LSV was obtained from 1.1 to 0.1 V ( $5 \text{ mV s}^{-1}$ , 1600 rpm). And its ring potential was set at 1.3 V. Used the subsequent equations to calculate their specific values:

$$\text{H}_2\text{O}_2(\%) = 200 \times \frac{\frac{I_r}{N}}{I_d + \frac{I_r}{N}}$$

$$n = 4 \times \frac{I_d}{I_d + \frac{I_r}{N}}$$

Wherein,  $I_r$ : ring current;  $I_d$ : disk current;  $N$ : collection efficiency of the Pt ring ( $N = 0.37$ ).

Similarly, the same catalyst ink was loaded ( $5 \mu\text{L}$ ) on a glassy carbon working electrode (GCE; 3 mm diameter) to evaluate the **OER** performance tests on a CHI 660D

electrochemical workstation in 0.1 M KOH. The reference Ir/C catalyst ink was also prepared in the same manner and loaded on polished GCE (5  $\mu\text{L}$  on 3 mm GCE; loading amount was  $0.26 \text{ mg cm}^{-2}$ ). Herein, the three-electrode system is assembled by a catalyst-loaded GCE working electrode, a graphite counter electrode, and a Hg/HgO reference electrode. LSV curves were acquired by scanning the potential from 0 to 0.8 V versus the Hg/HgO electrode with a scanning speed of  $5 \text{ mV s}^{-1}$ . The electrochemical impedance spectroscopy (EIS) tests were performed from 0.1 to 100 kHz. CV cycling tests were carried out on GCE electrodes, while the chronoamperometric  $i-t$  tests were carried out on carbon cloth current collectors (loading amount =  $2 \text{ mg cm}^{-2}$ ).

A rechargeable **Zn-Air battery** was constructed in a 6 M KOH aqueous electrolyte consisting of 0.2 M  $\text{Zn}(\text{Ac})_2$  using a CHI 660D electrochemical workstation. Polished zinc sheet was used as a metal anode (thickness of 0.3 mm), and the bifunctional electrocatalyst-loaded carbon paper was employed as air cathode. Electrocatalyst ink preparation is the same as above, and the obtained homogeneous ink was loaded on carbon paper and dried in a  $50 \text{ }^\circ\text{C}$  electric oven before assembling the Zn-air battery. While Pt/C+Ir/C mixed catalyst ink was also prepared in the same method by dispersing 5 mg of both catalysts (1:1 wt.%) in a mixed solution of 750  $\mu\text{L}$  of water, 250  $\mu\text{L}$  of deionized water, and 50  $\mu\text{L}$  of Nafion ink by ultrasonication for 30 min. The homogenous ink was dropped onto the carbon paper, and the mass loading of the catalysts was  $1.0 \text{ mg cm}^{-2}$ . Electrolyte was replaced by pausing the experiment in order to check the rechargeability of a ZAB during the charge-discharge cycling test. All the electrochemical data of the as-prepared electrocatalysts presented in this article has been tested twice to make sure all the results are reliable and reproducible.

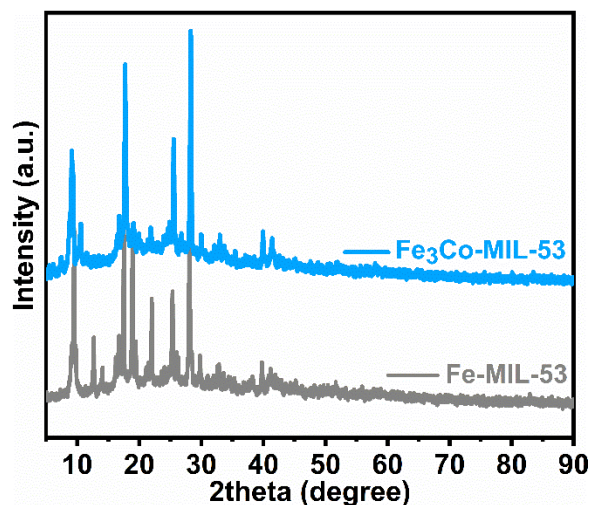

**Fig. S1.** Powder XRD patterns of Fe-MIL-53, and Co-doped Fe<sub>3</sub>Co-MIL-53.

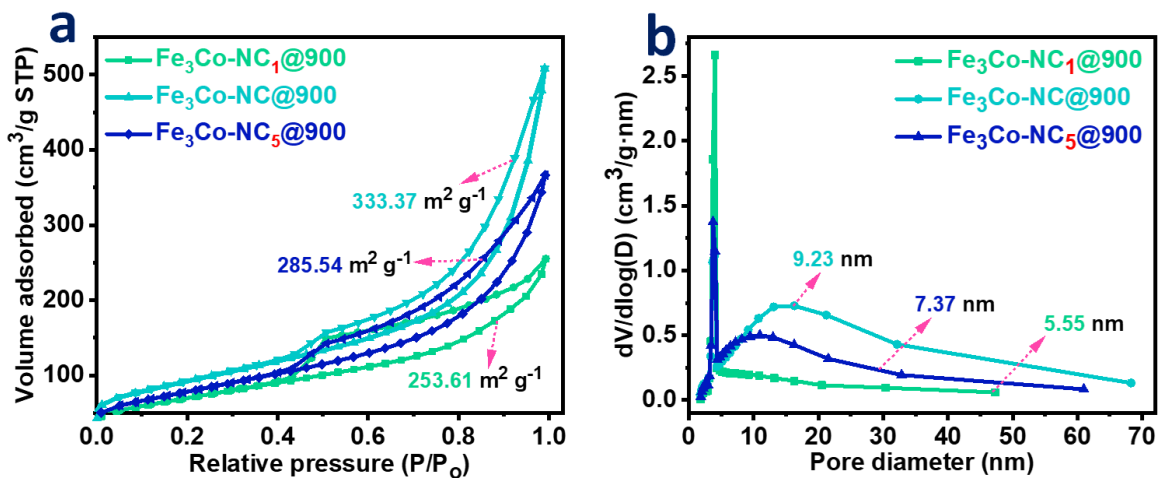

**Fig. S2.** (a) BET SSA profile of Fe<sub>3</sub>Co-NC<sub>1</sub>@900, Fe<sub>3</sub>Co-NC@900 and Fe<sub>3</sub>Co-NC<sub>5</sub>@900, and (b) the corresponding BJH desorption curve.

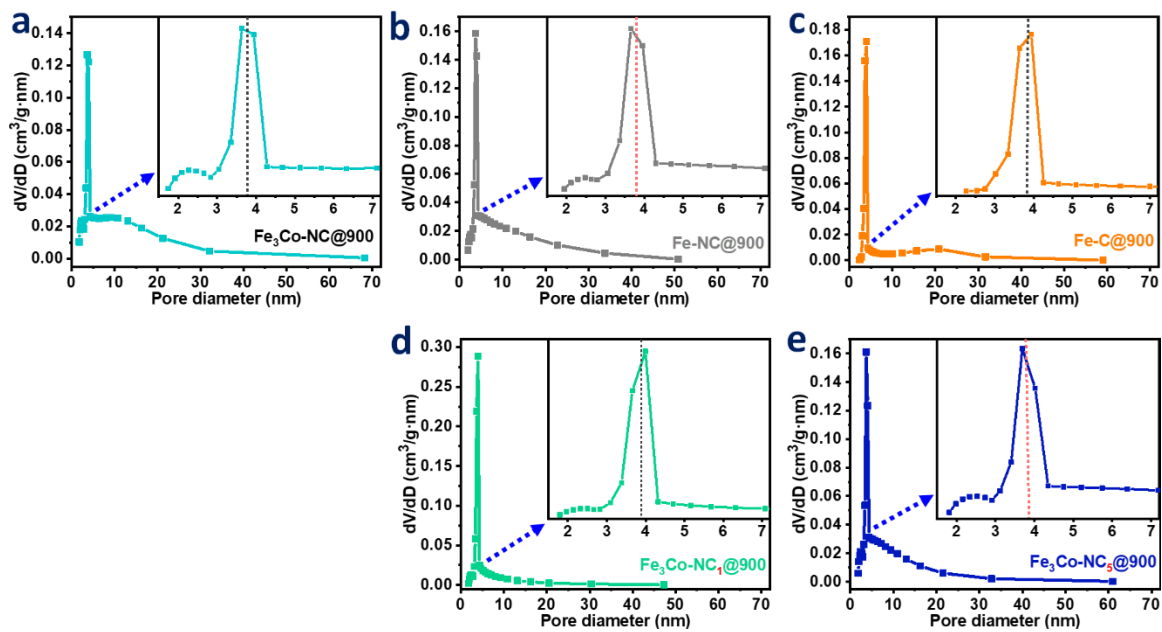

**Fig. S3.** (a-e) BJH desorption curves of MIL-derived electrocatalysts.

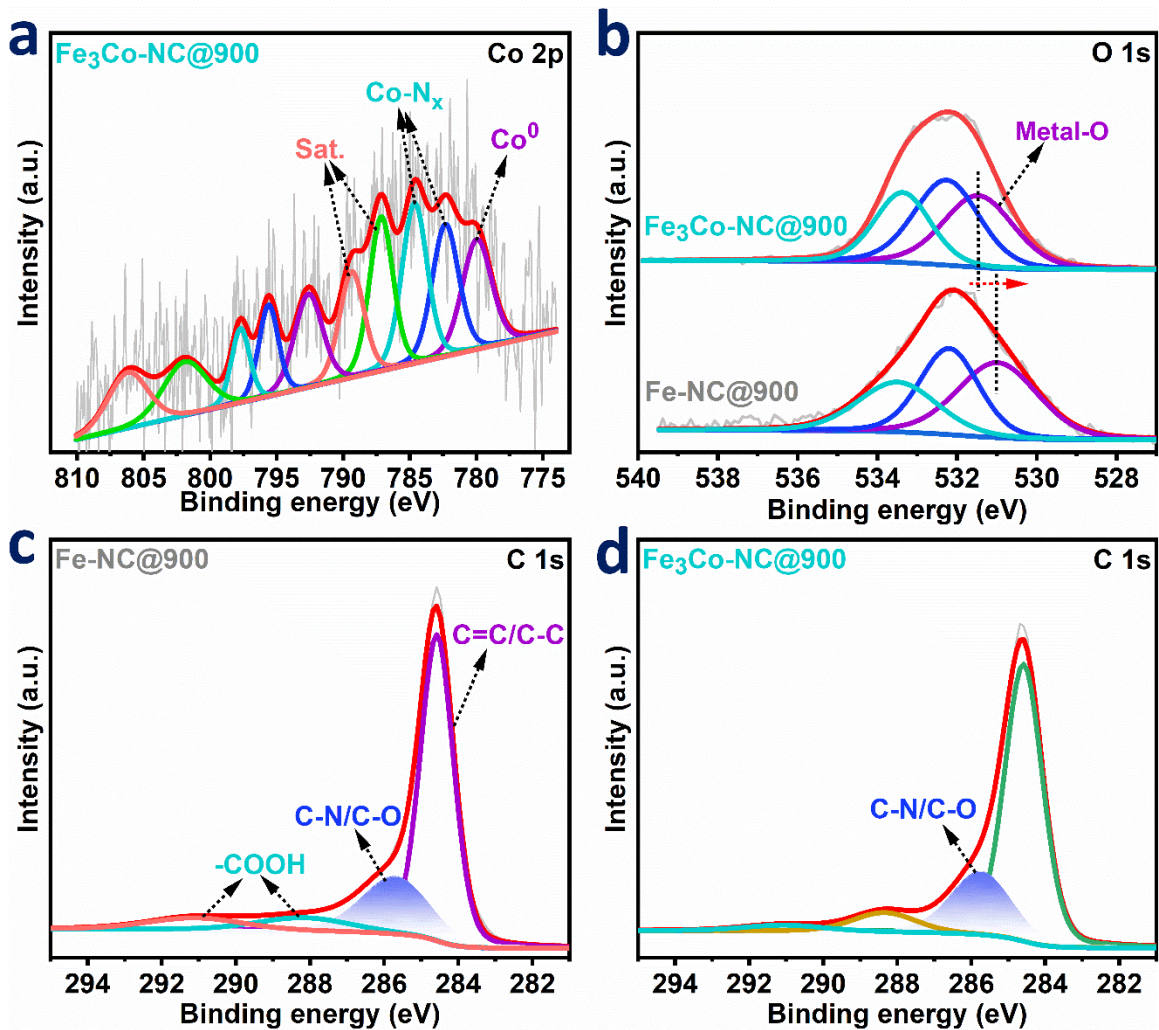

**Fig. S4.** High-resolution (a) Co 2p XPS spectrum of Fe<sub>3</sub>Co-NC@900, and (b) O 1s XPS spectral data of Fe-NC@900 and Fe<sub>3</sub>Co-NC@900 and (c,d) C 1s XPS spectral data of Fe-NC@900 and Fe<sub>3</sub>Co-NC@900.



|                        | Fe-NC@900    | Fe <sub>3</sub> Co-NC@900 |
|------------------------|--------------|---------------------------|
| Pyridinic-N            | 31.14        | 30.5                      |
| <b>M-N<sub>x</sub></b> | <b>18.67</b> | <b>19.37</b>              |
| Pyrrolic-N             | 21.37        | 20.66                     |
| Graphitic-N            | 14.8         | 20                        |
| Oxidized-N             | 14.016       | 9.46                      |

**Table S1.** Area percentage of different N species in both Fe-NC@900 and Fe<sub>3</sub>Co-NC@900.

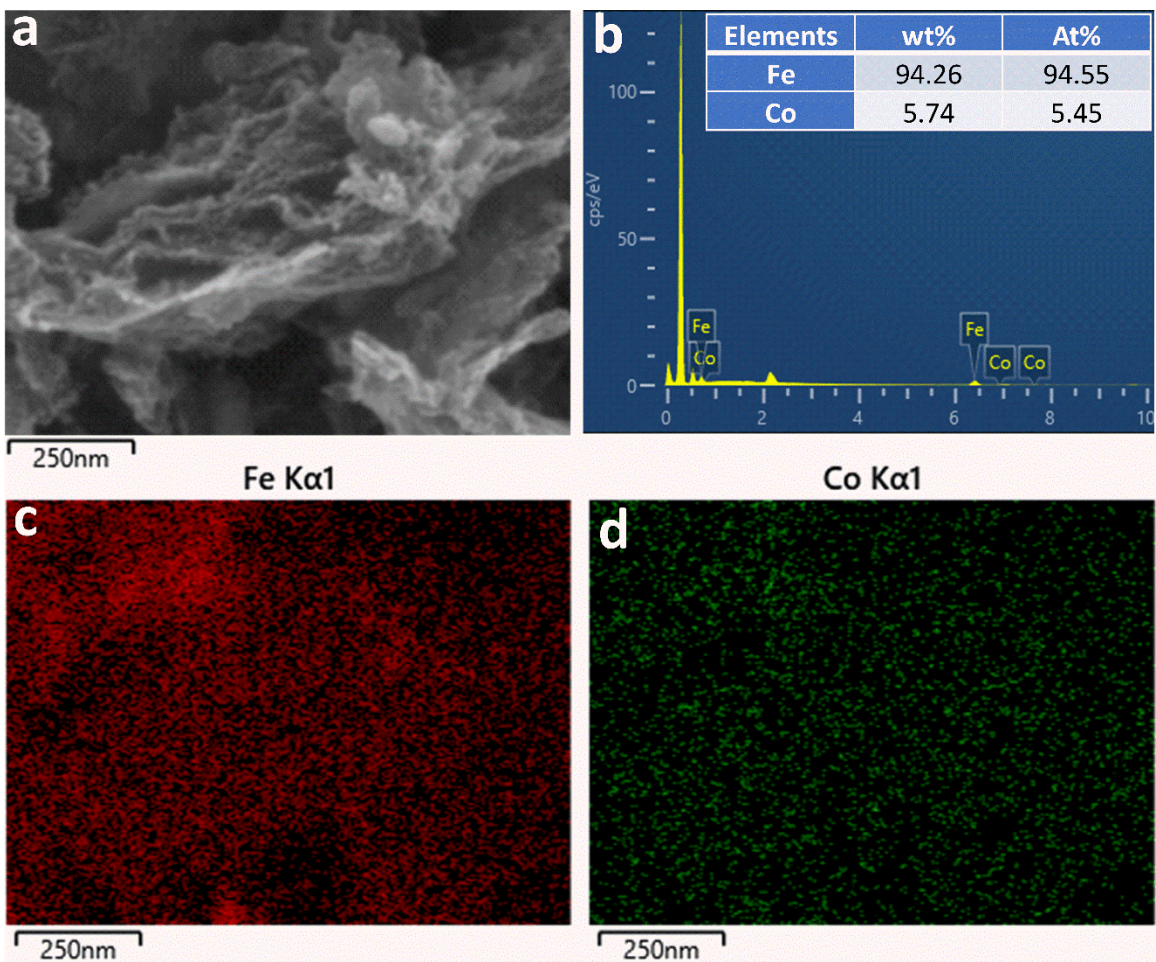

**Fig. S5.** (a-d) SEM image of Fe<sub>3</sub>Co-NC@900 with elemental percentage and the mapping images of Fe and Co elements.

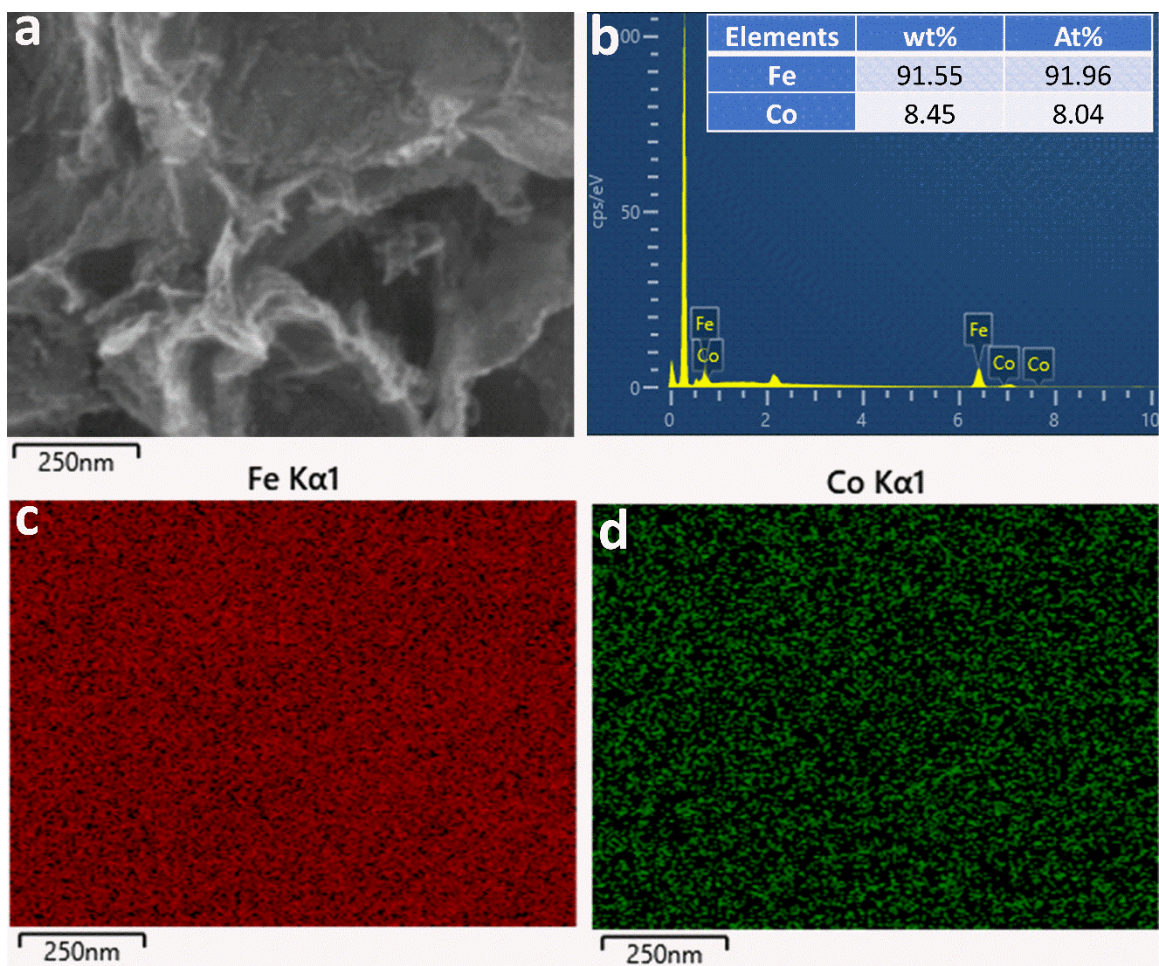

**Fig. S6.** (a-d) SEM image of FeCo-NC@900 with elemental percentage and the mapping images of Fe and Co elements.



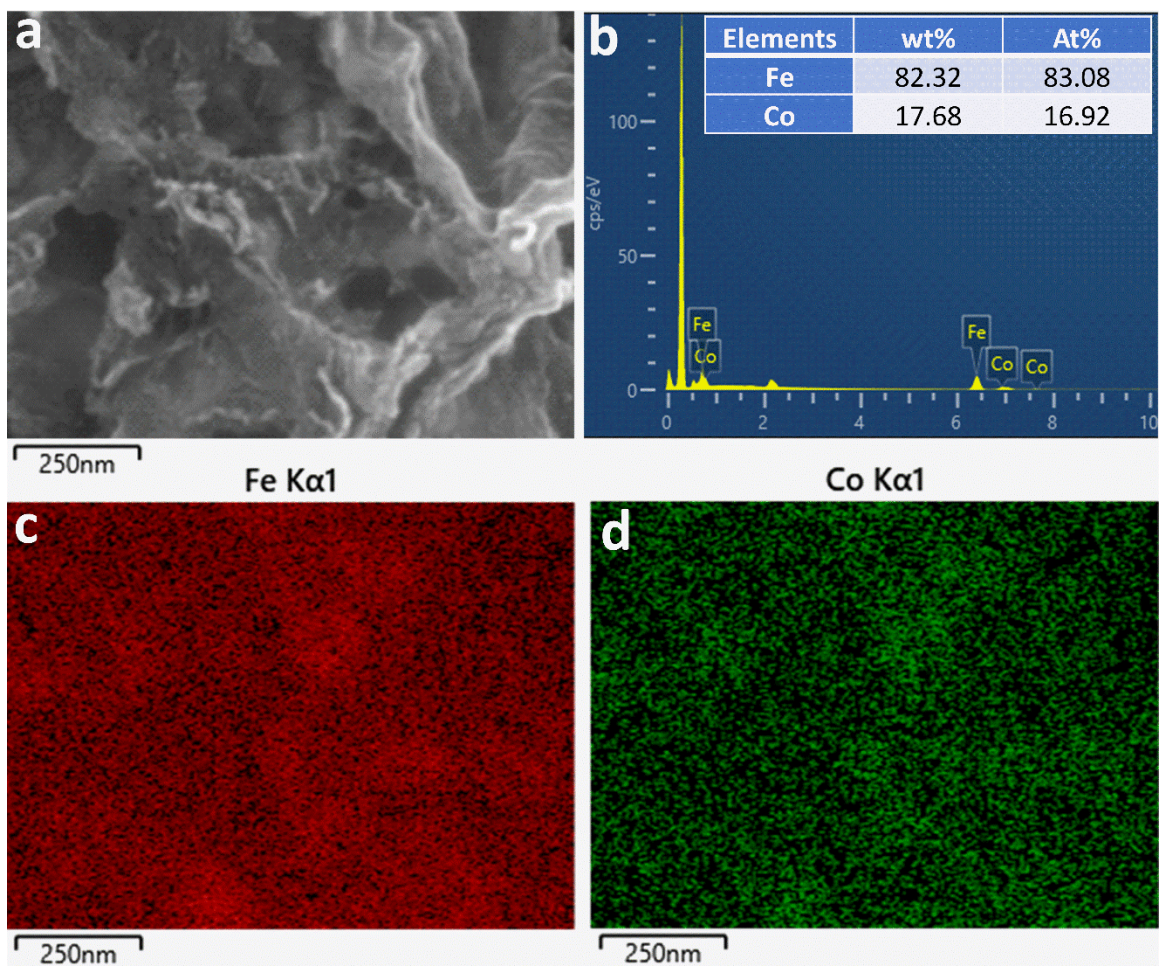

**Fig. S7.** (a-d) SEM image of FeCo<sub>3</sub>-NC@900 with elemental percentage and the mapping images of Fe and Co elements.

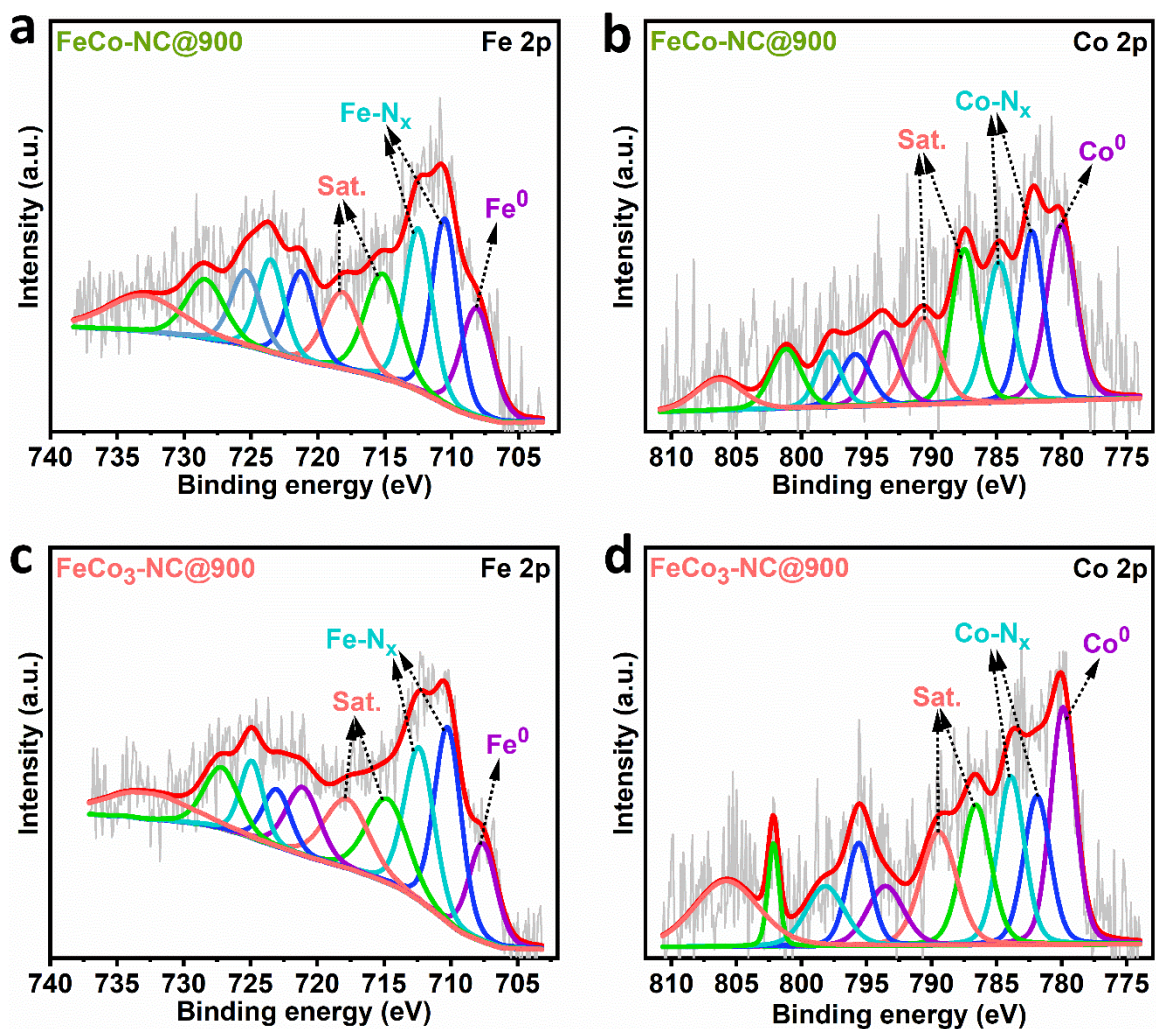

**Fig. S8.** (a,b) High-resolution Fe 2p and Co 2p XPS spectral data of FeCo-NC@900. (c,d) High-resolution Fe 2p and Co 2p XPS spectral data of FeCo<sub>3</sub>-NC@900.

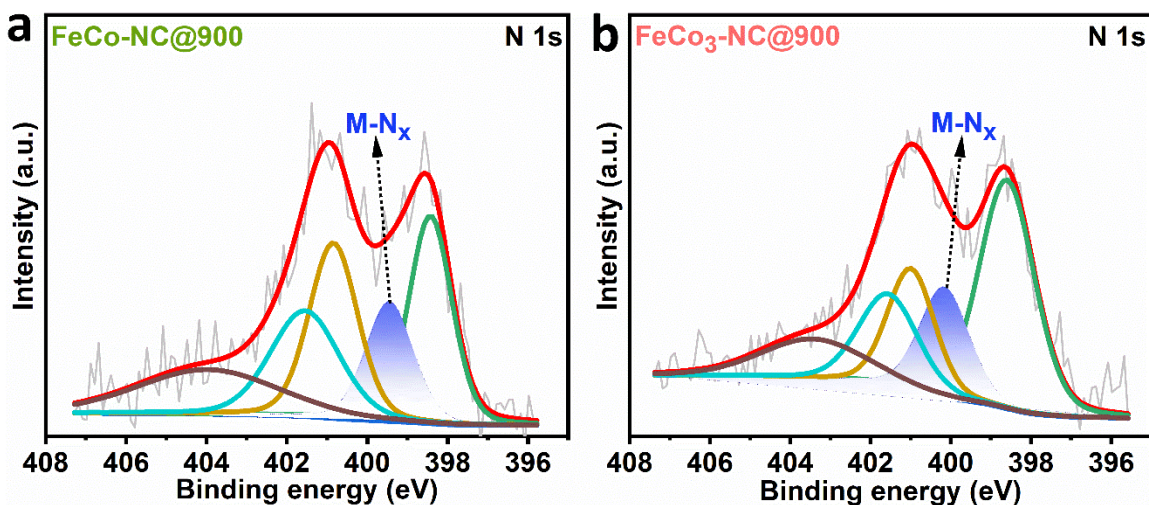

**Fig. S9.** (a,b) High-resolution N 1s XPS spectral data of FeCo-NC@900, and FeCo<sub>3</sub>-NC@900, respectively.

|                        | Fe <sub>3</sub> Co-NC@900 | FeCo-NC@900  | FeCo <sub>3</sub> -NC@900 |
|------------------------|---------------------------|--------------|---------------------------|
| Pyridinic-N            | 30.5                      | 24.25        | 37.85                     |
| <b>M-N<sub>x</sub></b> | <b>19.37</b>              | <b>15.62</b> | <b>16.47</b>              |
| Pyrrolic-N             | 20.66                     | 23.2         | 17.1                      |
| Graphitic-N            | 20                        | 19.78        | 16.16                     |
| Oxidized-N             | 9.46                      | 17.14        | 12.42                     |

**Table S2.** Area percentage of different N species in Fe<sub>3</sub>Co-NC@900, Fe-NC@900 and FeCo<sub>3</sub>-NC@900.



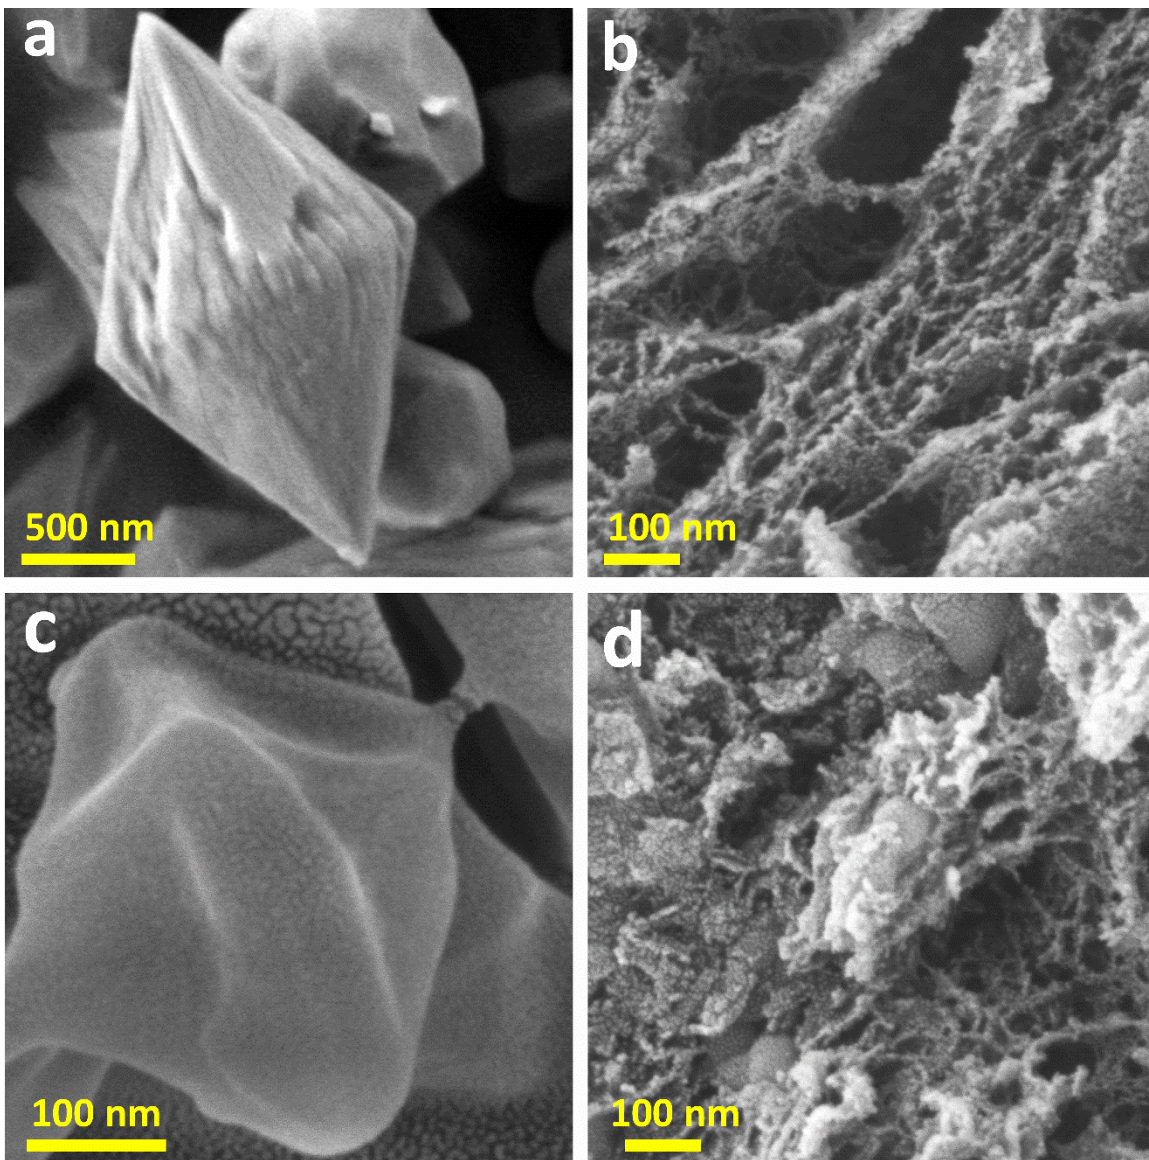

**Fig. S10.** SEM images of (a) Fe-MIL-53, (b) Fe-NC@900, (c) Fe<sub>3</sub>Co-MIL-53, and (d) Fe<sub>3</sub>Co-NC@900, respectively.

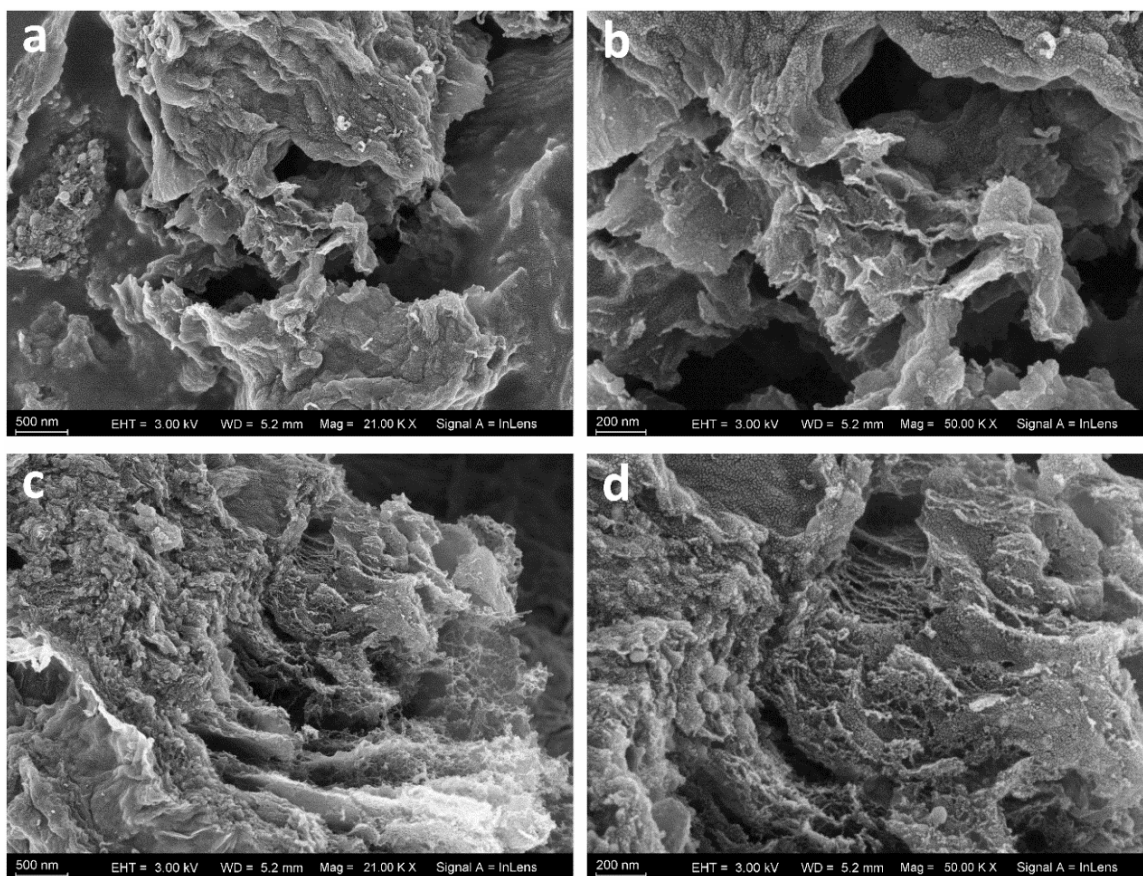

**Fig. S11.** SEM images of (a,b) FeCo-NC@900, and (c,d) FeCo<sub>3</sub>-NC@900 at different magnifications.

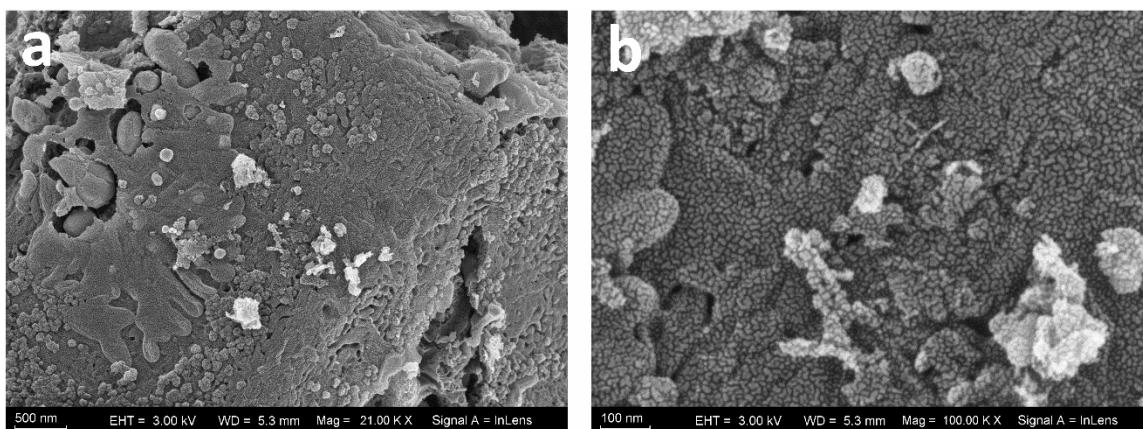

**Fig. S12.** SEM images of Fe<sub>3</sub>Co-C@900 at different magnifications.



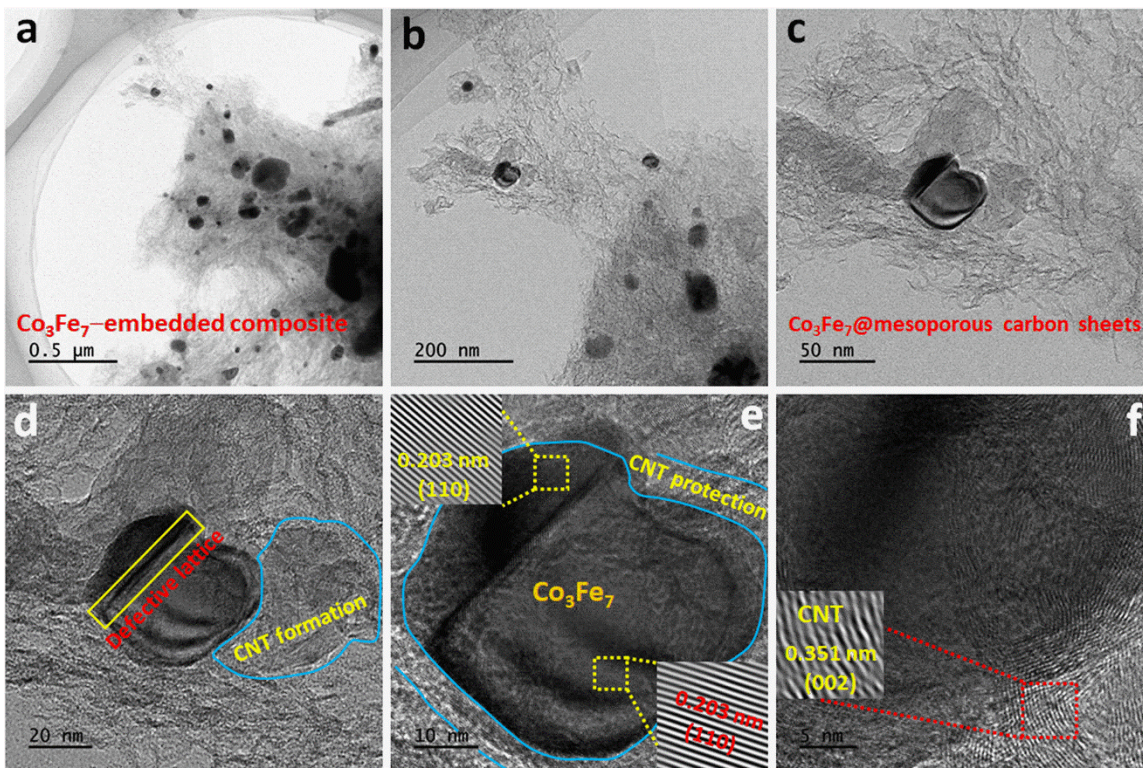

**Fig. S13.** (a-f) Additional TEM and HR-TEM images of Fe<sub>3</sub>Co-NC@900.

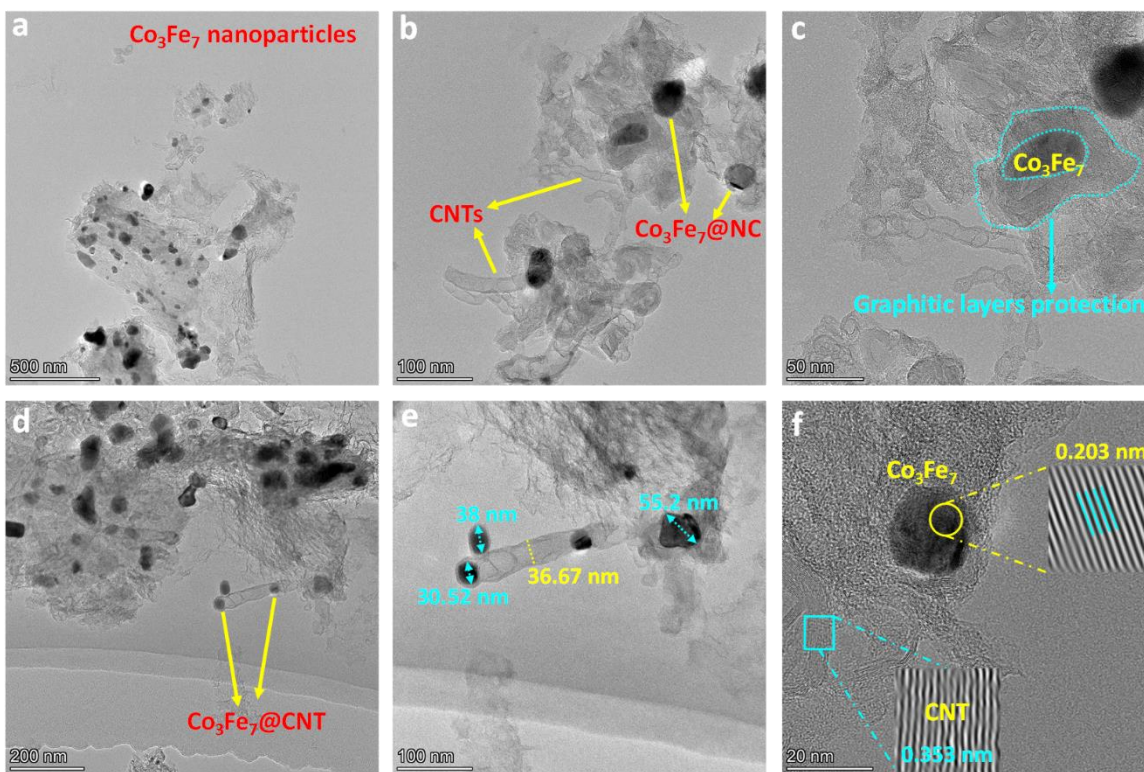

**Fig. S14.** (a-f) TEM and HR-TEM images of FeCo-NC@900.



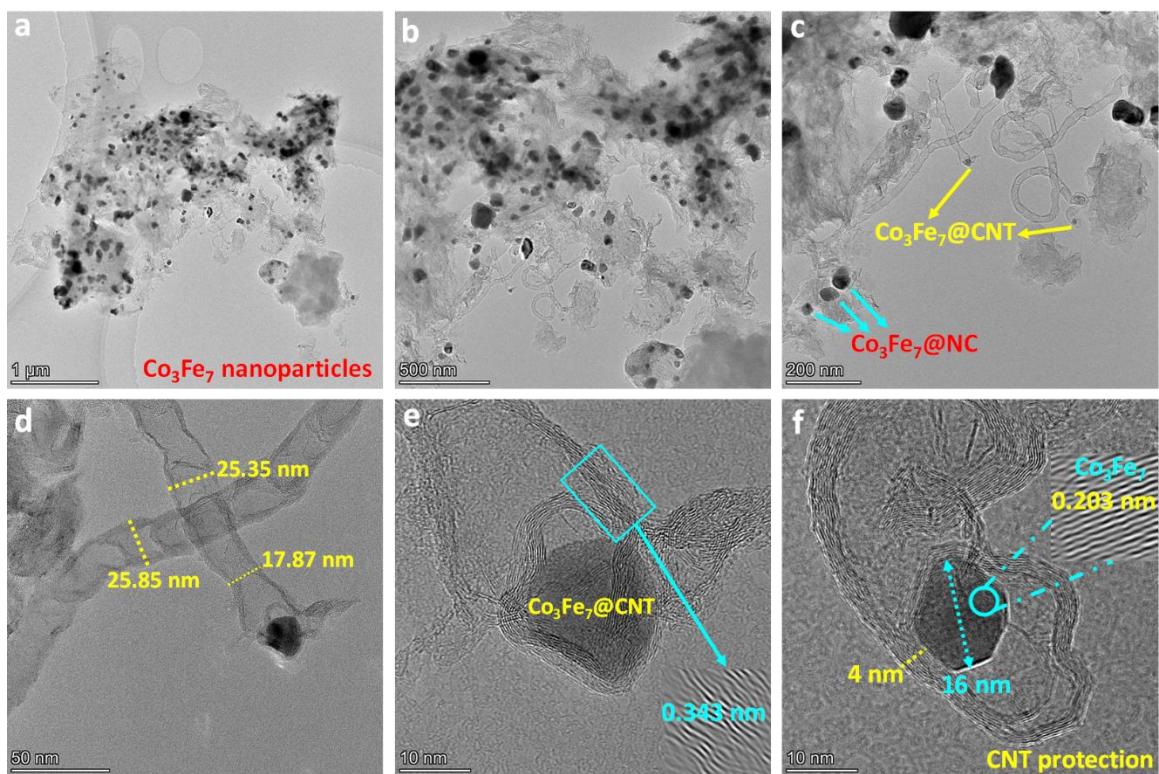

**Fig. S15.** (a-f) TEM and HR-TEM images of FeCo<sub>3</sub>-NC@900.

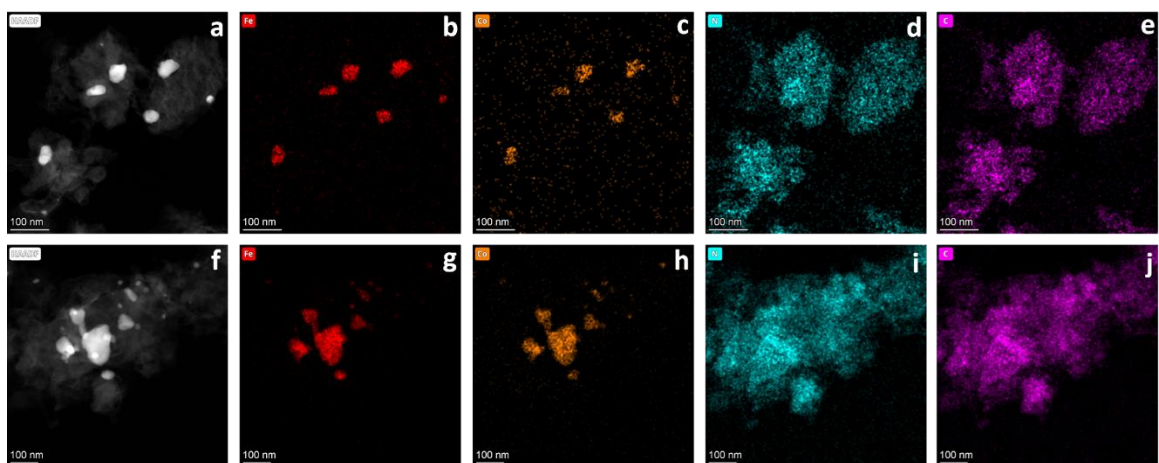

**Fig. S16.** (a-e) HAADF-STEM and EDS-elemental mapping images of FeCo-NC@900, and (f-j) HAADF-STEM and EDS-elemental mapping images of FeCo<sub>3</sub>-NC@900.

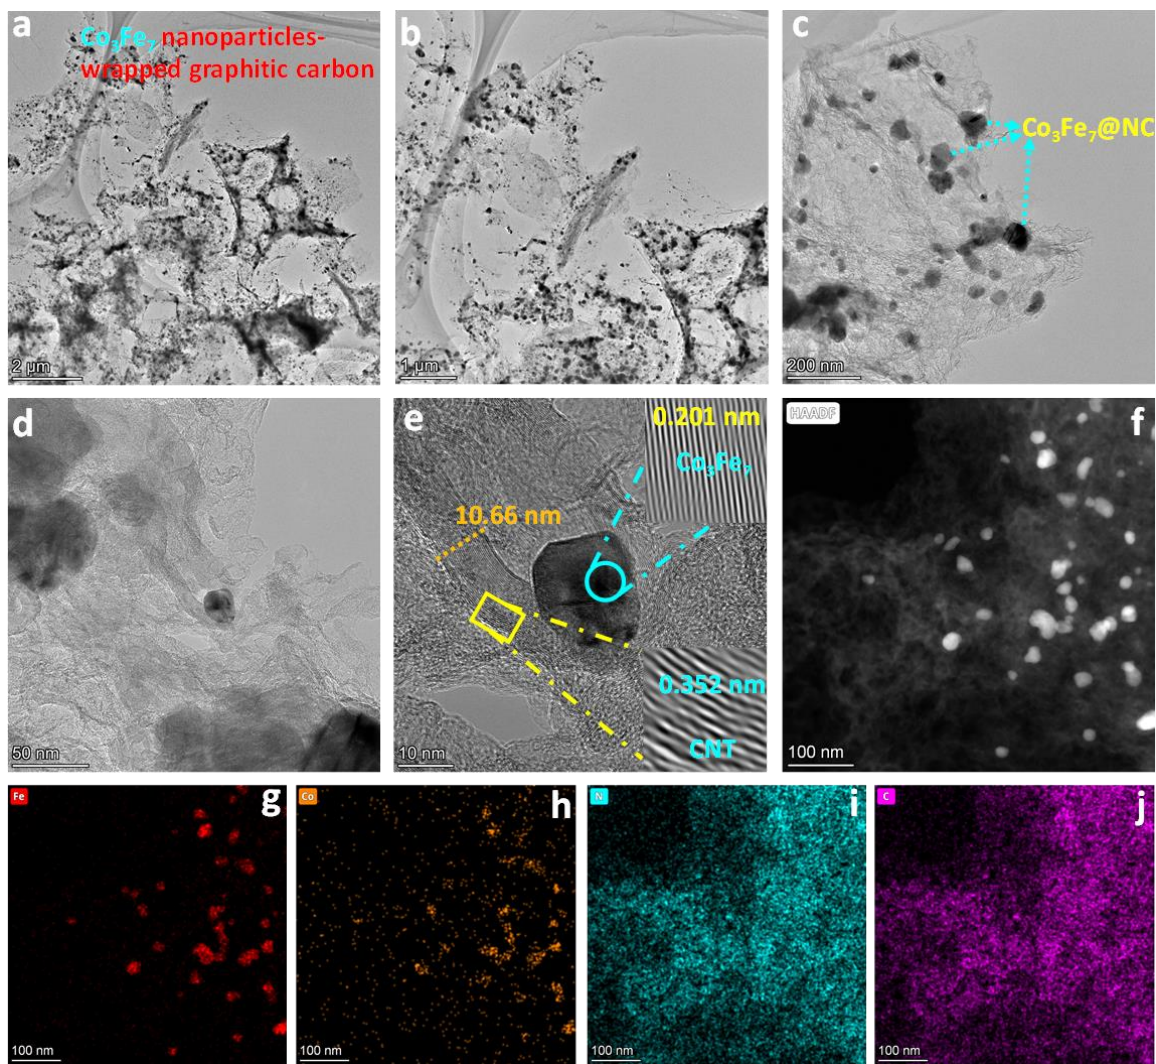

**Fig. S17.** (a-e) TEM and HR-TEM, (f) HAADF-STEM, and (g-j) the corresponding EDS-mapping images of  $\text{Fe}_3\text{Co-NC}_5@900$ .



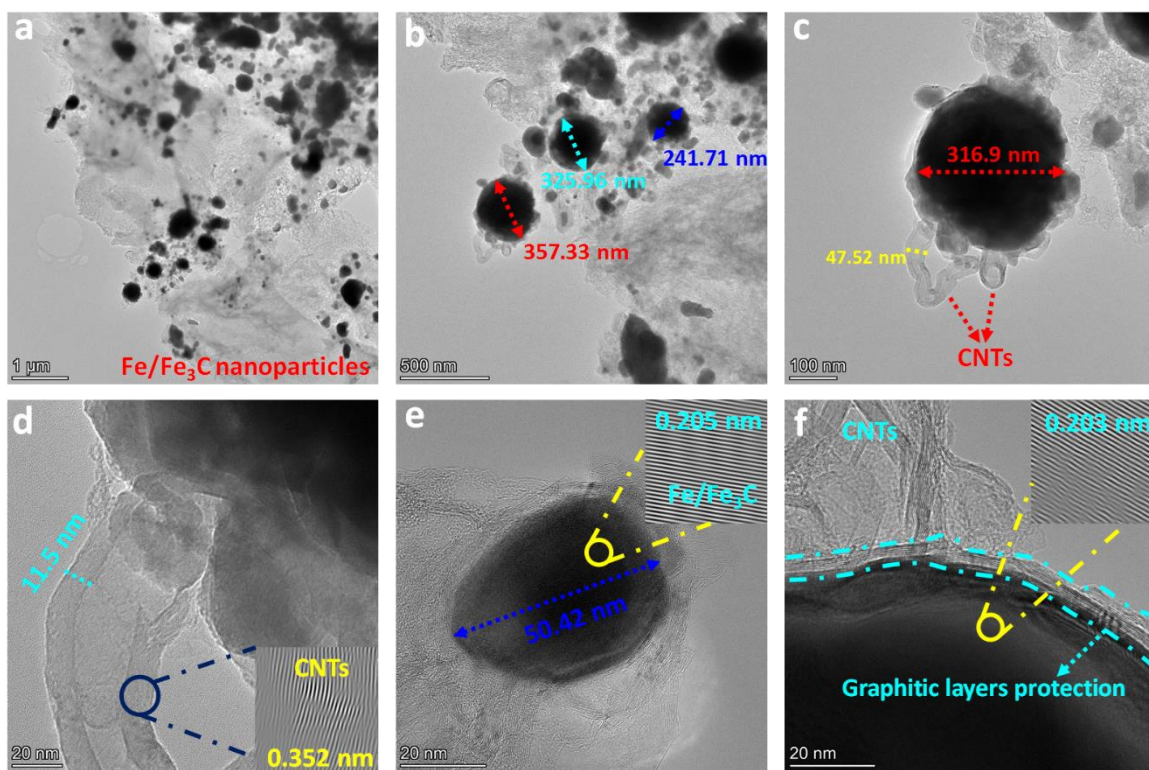

**Fig. S18.** (a-f) TEM and HR-TEM images of Fe-NC@900.

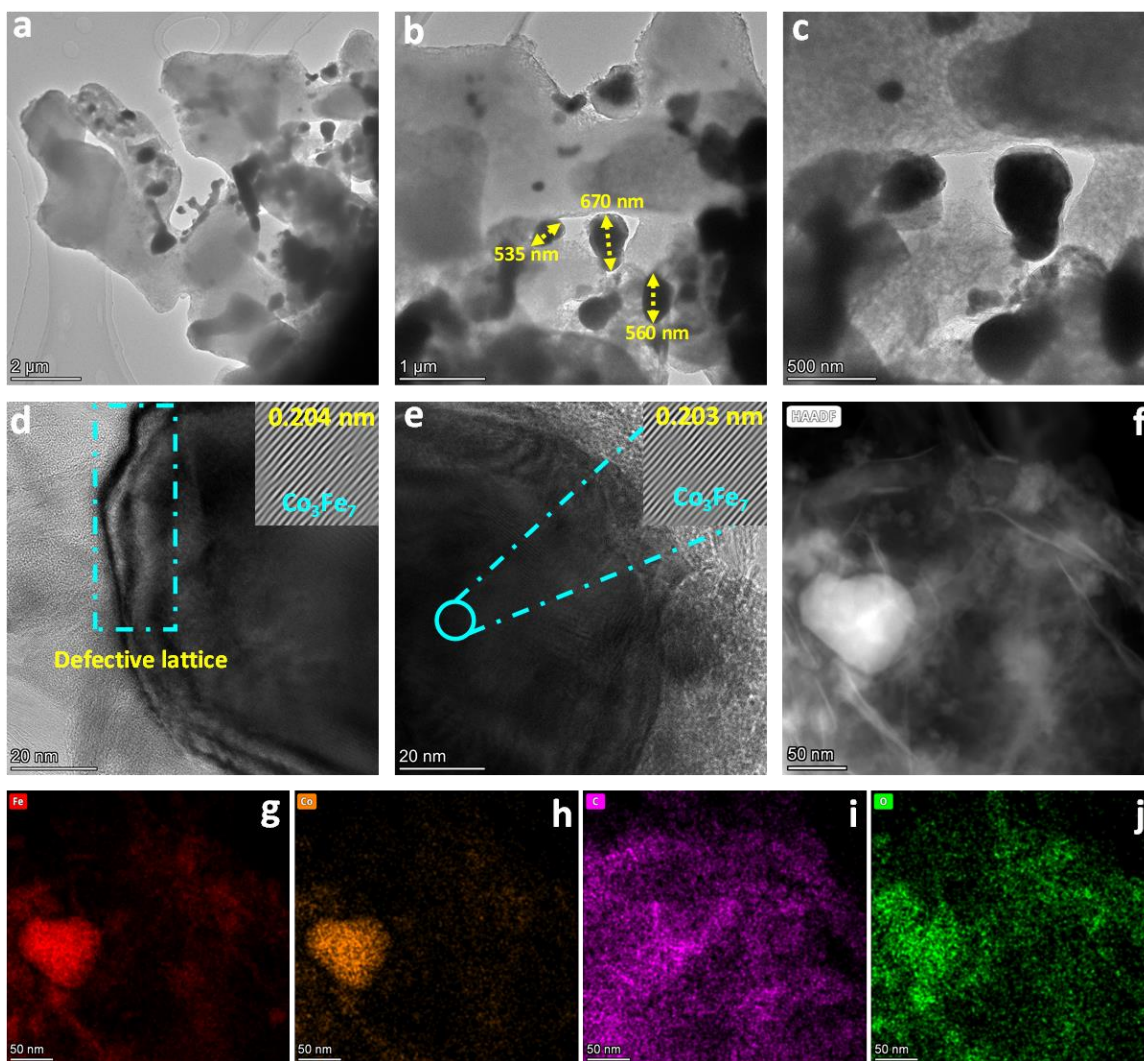

**Fig. S19.** (a-e) TEM and HR-TEM, (f) HAADF-STEM, and (g-j) the corresponding EDS-mapping images of Fe<sub>3</sub>Co-C@900.

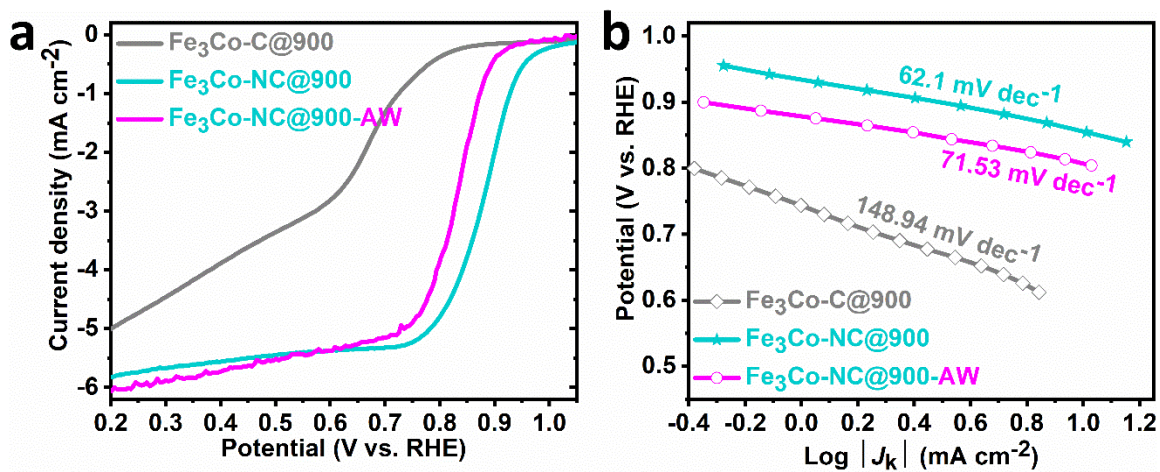

**Fig. S20.** (a) LSV curves of Fe<sub>3</sub>Co-C@900, Fe<sub>3</sub>Co-NC@900, and Fe<sub>3</sub>Co-NC@900-AW in 0.1 M KOH, (b) corresponding Tafel slopes.



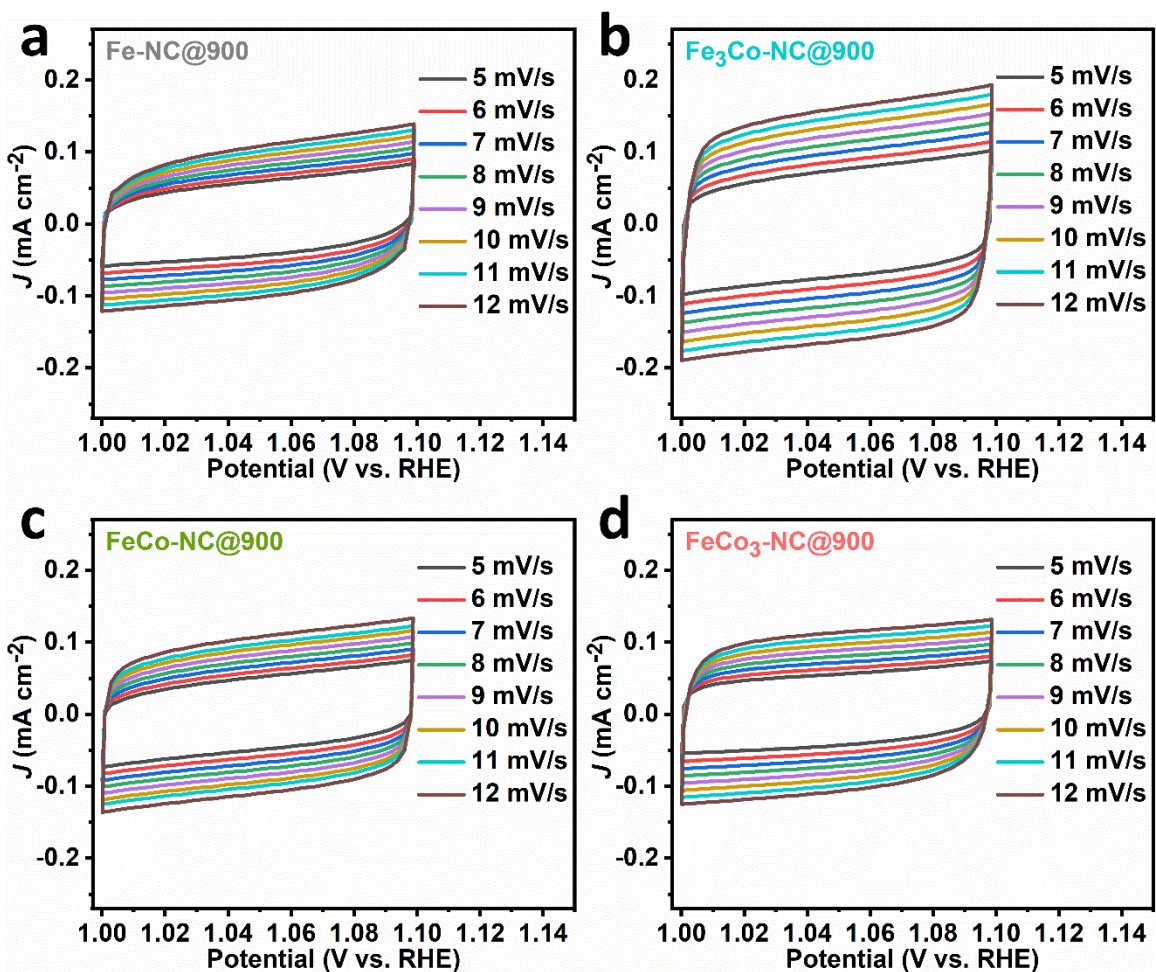

**Fig. S21.** (a-d) The plots of cyclic voltammograms operated within the non-Faradaic capacitive current range to estimate the ECSA in 0.1 M KOH electrolyte for electrocatalysts, Fe-NC@900, Fe<sub>3</sub>Co-NC@900, FeCo-NC@900 and FeCo<sub>3</sub>-NC@900, respectively.



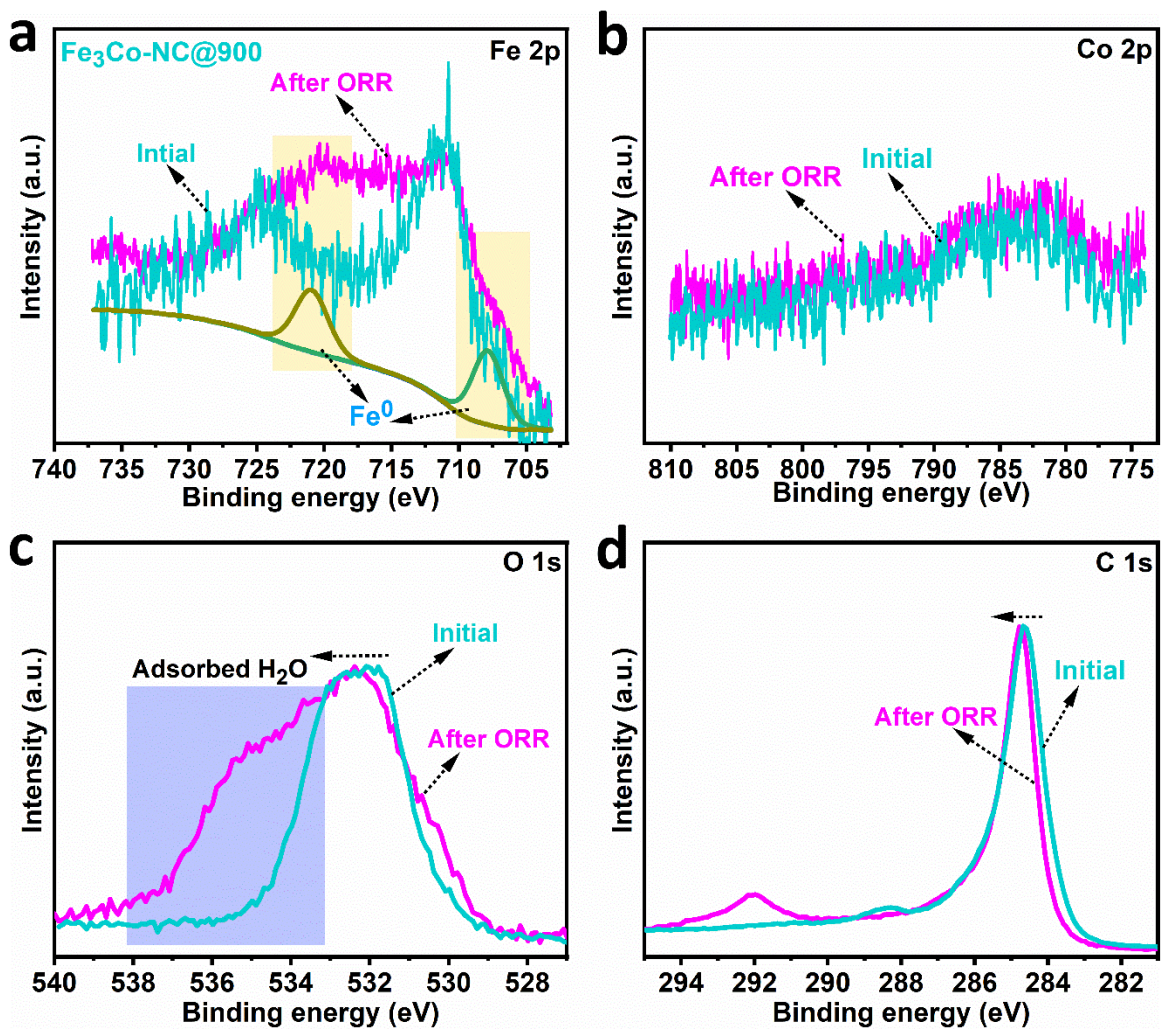

**Fig. S22.** High-resolution (a) Fe 2p, (b) Co 2p, (c) O 1s and (d) C 1s spectral data of  $\text{Fe}_3\text{Co-NC@900}$  after ORR.

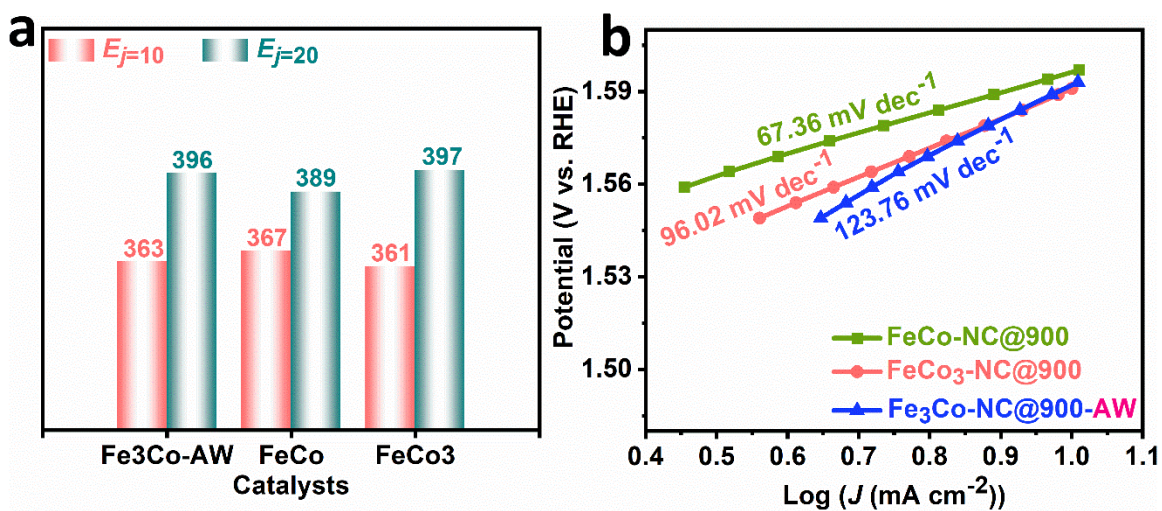

**Fig. S23.** (a) Overpotential values at 10, and 20 mA cm<sup>-2</sup> current densities for Fe<sub>3</sub>Co-NC@900-AW, FeCo-NC@900, and FeCo<sub>3</sub>-NC@900 electrocatalysts, (b) Tafel slopes of corresponding electrocatalysts.

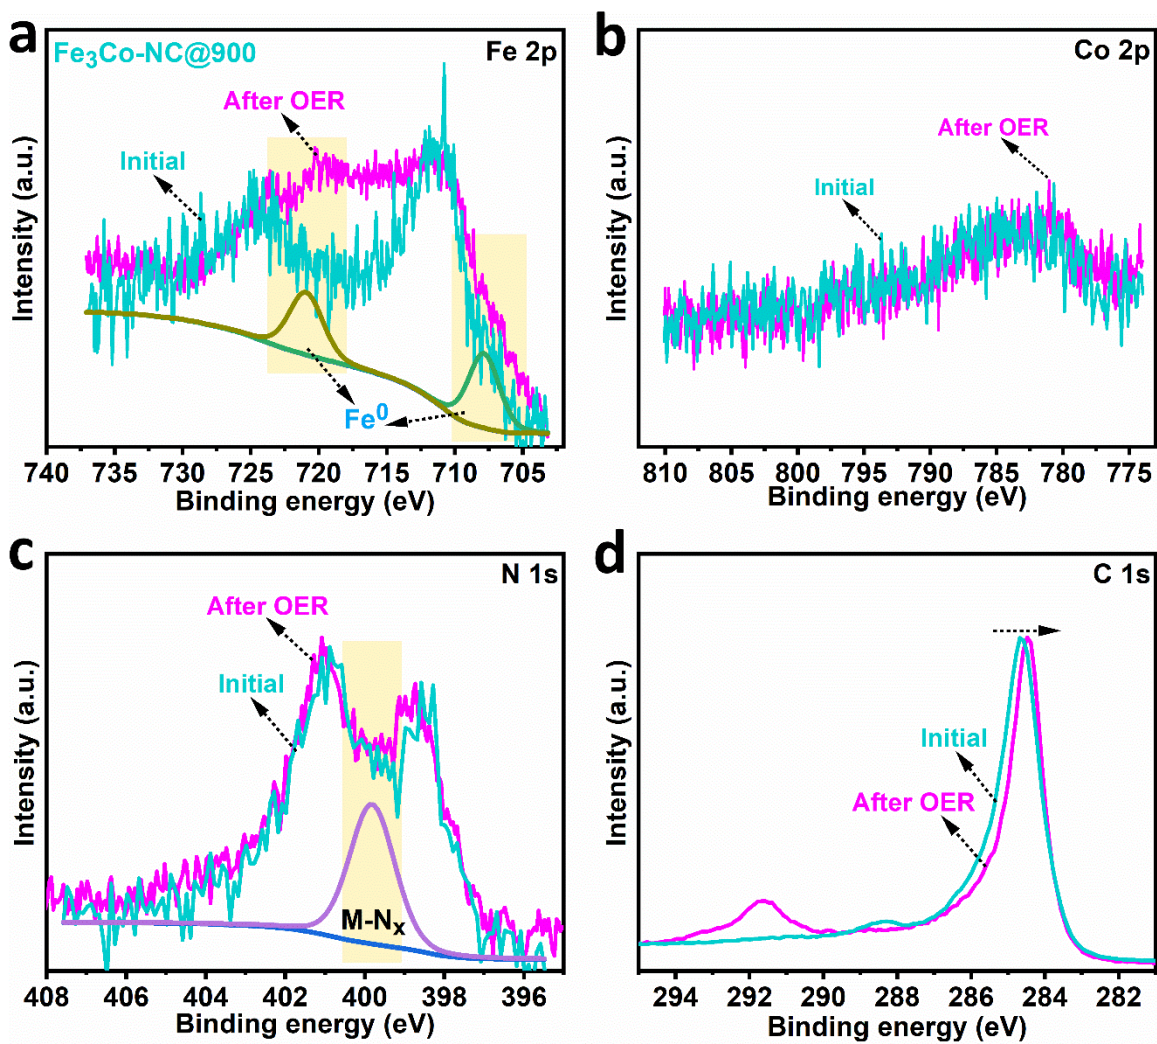

**Fig. S24.** High-resolution (a) Fe 2p, (b) Co 2p, (c) O 1s and (d) C 1s spectral data of  $\text{Fe}_3\text{Co-NC@900}$  after ORR.



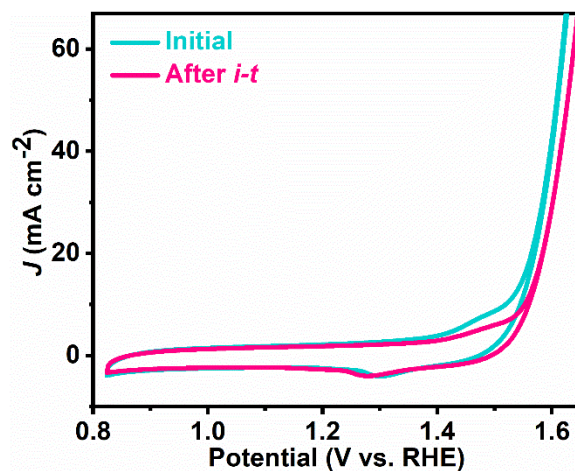

**Fig. S25.** CV curves obtained before and after the OER *i-t* test on carbon fibre current collector for Fe<sub>3</sub>Co-NC@900.

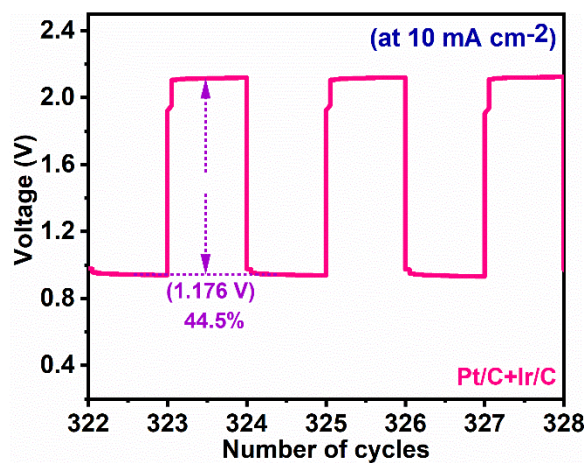

**Fig. S26.** Zoomed-in view of charge/discharge curves at above 322 cycles for Pt/C+Ir/C-based ZAB.

**Table S3:** ORR performance of Fe<sub>3</sub>Co-NC@900 in comparison with the other nanoparticles associated SACs or DACs reported recently in 0.1 M KOH solution.

| Materials                                                 | $E_{onset}$<br>(V) | $E_{1/2}$<br>(V) | $J_d$ at 0.3 V<br>(mA cm <sup>-2</sup> ) | Ref.      |
|-----------------------------------------------------------|--------------------|------------------|------------------------------------------|-----------|
| Fe-NC@900                                                 | 0.975              | 0.788            | 5.44                                     | This work |
| Fe <sub>3</sub> Co-NC@900                                 | 1.07               | 0.88             | 5.68                                     |           |
| Pt/C (20 wt.%)                                            | 1.01               | 0.82             | 5.44                                     |           |
| Fe,Co/DSA-NSC                                             | NA                 | 0.879            | ~5.4                                     | 1         |
| Co <sub>3</sub> Fe <sub>7</sub> @Co/Fe-SAC                | NA                 | 0.841            | ~5.6                                     | 2         |
| CoFe/S-NC                                                 | NA                 | 0.809            | NA                                       | 3         |
| SA&NP-FeCo-NTS                                            | 0.98               | 0.87             | 5.7                                      | 4         |
| Fe/12Zn/Co-NCNTs                                          | 1.026              | 0.879            | ~5.6                                     | 5         |
| Co <sub>3</sub> Fe <sub>7</sub> @Co <sub>5.47</sub> N/NCF | 1.02               | 0.92             | ~7.0                                     | 6         |
| FeCo-N,S-G                                                | NA                 | 0.88             | ~5.2                                     | 7         |
| FeS/FeNSC                                                 | NA                 | 0.91             | ~5.4                                     | 8         |
| FeNC                                                      | NA                 | 0.88             | ~5.4                                     |           |
| FeS/G <sub>(Fe/GO = 1:4)</sub>                            | 1.0                | 0.845            | ~5.0                                     | 9         |
| CoFeS <sub>2</sub> /NC                                    | 0.84               | 0.759            | ~4.5                                     | 10        |
| FeS-FeNC@NSC                                              | NA                 | 0.886            | 5.4                                      | 11        |

|                           |       |       |      |    |
|---------------------------|-------|-------|------|----|
| Fe-S, N-C-950             | 0.998 | 0.9   | ~5.0 | 12 |
| FeS/ZnS@N,S-C-900         | 1.0   | 0.88  | 5.6  | 13 |
| Fe-N-HMCTs                | 0.992 | 0.872 | 5.66 | 14 |
| 1MIL/40ZIF-1000           | 0.97  | 0.88  | 4.66 | 15 |
| d-(CONP/COSA-N-C)         | NA    | 0.83  | ≈4.5 | 16 |
| Fe <sub>3</sub> C@NCNTs   | NA    | 0.84  | 5.8  | 17 |
| NP-Fe-NHPC                | 0.97  | 0.88  | ≈5.1 | 18 |
| SA-Fe-NHPC                | 1.01  | 0.93  | ≈6.0 | 18 |
| PA@Z8-Fe-N-C              | NA    | 0.88  | ≈5.2 | 19 |
| Z8-Fe-N-C                 | NA    | 0.83  | ≈5.0 |    |
| FeSA-FeNC@NSC             | NA    | 0.90  | ≈5.0 | 20 |
| Fe <sub>3</sub> C-FeN/NC  | 0.95  | 0.80  | 5.1  | 21 |
| Fe <sub>3</sub> C@NPW     | NA    | 0.87  | ≈5.2 | 22 |
| Fe <sub>3</sub> C@N/MCHSs | 1.01  | 0.875 | ≈5.4 | 23 |

**Abbreviations:** NA = not available; DSA-NSC = dual single atoms-embedded N/S-doped Carbon; SA&NP-FeCo-NTS = bimetallic atomic FeN<sub>4</sub>, CoN<sub>4</sub>, and FeCo alloy nanoparticles and a unique nanotube-assembled-sphere; NCNTs = N-doped carbon nanotubes; NCF = nitrogen-doped carbon foam; FeCo-N,S-G = Fe, Co, N, and S co-doped three-dimensional (3D) porous graphene-like catalyst; FeS/FeNSC represents Fe-N<sub>4</sub> sites

and FeS nanoparticles embedded N/S-doped carbon; FeS/G = iron sulfide/graphene oxide; NC = N-doped carbon and NSC = N/S-co-doped carbon; N-HMCTs = N-doped hollow mesoporous carbon tubes, consists of Fe-N<sub>x</sub> and Fe<sub>3</sub>C; 1MIL/40ZIF-1000 consists of Fe-N-C sites and Fe-Fe<sub>3</sub>C; d-(Co<sub>NP</sub>/Co<sub>SA</sub>-N-C) consists of CoN<sub>4</sub> sites and Co; In Fe<sub>3</sub>C@NCNTs, NCNTs = N-doped carbon nanotubes, consists of Fe-N<sub>4</sub> sites and Fe<sub>3</sub>C; In NP-Fe-NHPC, NHPC = hierarchically porous carbon, consists of single atom Fe-N<sub>x</sub> sites and Fe nanoparticles; In SA-Fe-NHPC, SA = Fe single atom sites; In PA@Z8-Fe-N-C; PA = phenylboronic acid, Z8 = ZIF-8, N-C = N-doped carbon, consists of Fe-N-C sites; Z8-Fe-N-C consists of Fe-N-C sites and Fe nanoparticles; In FeSA-FeNC@NSC, SA = single atom, NC= Nanocluster, NSC = N/S co-doped porous carbon, consists of Fe-N-C sites and Fe-nanoclusters; Fe<sub>3</sub>C-FeN/NC consists of Fe<sub>3</sub>C nanoparticles and Fe-N<sub>4</sub> sites; In Fe<sub>3</sub>C@NPW, NPW = paulownia wood-derived N-doped carbon, consists of Fe<sub>3</sub>C nanoparticles; In Fe<sub>3</sub>C@N/MCHSs, MCHSs = mesoporous carbon hollow spheres, consists of Fe<sub>3</sub>C nanoparticles.

**Table S4:** Bifunctional activity of Fe<sub>3</sub>Co-NC@900 in comparison with state-of-the-art electrocatalysts that have better or comparable bifunctional activity parameter ( $\Delta E$ ).

| <b>Materials</b>                                        | $E_{1/2}$<br>(V) | $E_{j=10}$<br>(V) | $\Delta E$<br>(V) | <b>Ref.</b>      |
|---------------------------------------------------------|------------------|-------------------|-------------------|------------------|
| <b>Fe-NC@900</b>                                        | <b>0.788</b>     | <b>1.608</b>      | <b>0.82</b>       | <b>This work</b> |
| <b>Fe<sub>3</sub>Co-NC@900</b>                          | <b>0.88</b>      | <b>1.572</b>      | <b>0.692</b>      |                  |
| <b>Pt/C (ORR) + Ir/C (OER)</b>                          | <b>0.82</b>      | <b>1.568</b>      | <b>0.748</b>      |                  |
| Fe,Co/DSA-NSC                                           | 0.879            | 1.44              | <b>0.561</b>      | 1                |
| PCL113                                                  | 0.918            | 1.498             | <b>0.580</b>      | 24               |
| Is-PCL                                                  | 0.923            | 1.514             | <b>0.591</b>      |                  |
| FeCo-NPCNs                                              | 0.87             | 1.47              | <b>0.60</b>       | 25               |
| AlNiCoRuMoCrFeTi                                        | 0.865            | 1.47              | <b>0.61</b>       | 26               |
| FeCo@MNC                                                | 0.86             | 1.47              | <b>0.62</b>       | 27               |
| CoNC@LDH                                                | 0.84             | 1.47              | <b>0.63</b>       | 28               |
| Fe-Phen-800                                             | 0.878            | 1.515             | <b>0.637</b>      | 29               |
| MnO <sub>2</sub> -NiFe                                  | 0.80             | 1.45              | <b>0.65</b>       | 30               |
| MnSAC                                                   | 0.915            | 1.58              | <b>0.665</b>      | 31               |
| S-Co <sub>9-x</sub> Fe <sub>x</sub> S <sub>8</sub> @rGO | 0.84             | 1.51              | <b>0.67</b>       | 32               |
| FAS-NSC@950                                             | 0.871            | 1.544             | <b>0.673</b>      | 33               |



|                                |       |       |              |    |
|--------------------------------|-------|-------|--------------|----|
| NiS <sub>x</sub> /NMC          | 0.89  | 1.57  | <b>0.68</b>  | 34 |
| CoFe-LDH@FeCo NPs-N-CNTs       | 0.87  | 1.55  | <b>0.68</b>  | 35 |
| Fe <sub>3</sub> C Fe-N-C       | 0.888 | 1.568 | <b>0.68</b>  | 36 |
| FeS/Fe <sub>3</sub> C@NS-C-900 | 0.78  | 1.5   | <b>0.72</b>  | 37 |
| CoFe/S-N-C                     | 0.844 | 1.588 | <b>0.744</b> | 3  |
| Fe, Co/N-C                     | 0.86  | 1.618 | <b>0.75</b>  | 38 |
| SAC-FeN-WPC                    | 0.85  | 1.63  | <b>0.78</b>  | 39 |
| Fe <sub>3</sub> C@NG800-0.2    | 0.811 | 1.591 | <b>0.78</b>  | 40 |
| FeCo-1/NSC                     | 0.82  | 1.555 | <b>0.83</b>  | 41 |
| FeCo-NCNFs-800                 | 0.817 | 1.686 | <b>0.869</b> | 42 |

**Abbreviations:** PCL113 = is a special terminology for NiFeLDH+COP<sub>BTC</sub>+CNTs; ls-PCL = Carbon black supported PCL113; AlNiCoRuMoCrFeTi = Eight-component high-entropy oxide; LDHs = layered double hydroxides; Phen = 1,10-phenanthroline monohydrate; SAC = single-atom catalyst; rGO = reduced Graphene Oxide; NMC = nitrogen-doped mesoporous carbon; CoFe-LDH@FeCo NPs-N-CNTs = CoFe-layer double hydroxide@FeCo nanoparticles embedded in N-doped carbon nanotubes; NS-C = N,S-dual doped carbon; WPC = wood-based porous carbon; and NG = N-doped graphitic layers.

## References:

- 1 G. Yasin, S. Ali, S. Ibraheem, A. Kumar, M. Tabish, M. A. Mushtaq, S. Ajmal, M. Arif, M. A. Khan, A. Saad, L. Qiao and W. Zhao, *ACS Catal.*, 2023, **13**, 2313–2325.
- 2 B. Liu, S. Wang, R. Feng, Y. Ni, F. Song and Q. Liu, *ACS Appl. Mater. Interfaces*, 2022, **14**, 38739–38749.
- 3 G. Li, Y. Tang, T. Fu, Y. Xiang, Z. Xiong, Y. Si, C. Guo and Z. Jiang, *Chem. Eng. J.*, 2022, **429**, 132174.
- 4 Q. Zhang, P. Liu, X. Fu, Y. Yuan, L. Wang, R. Gao, L. Zheng, L. Yang and Z. Bai, *Adv. Funct. Mater.*, 2022, **32**, 2112805.
- 5 J. Xue, S. Deng, R. Wang and Y. Li, *Carbon N. Y.*, 2023, **205**, 422–434.
- 6 M. Jiang, C. Fu, R. Cheng, W. Zhang, T. Liu, R. Wang, J. Zhang and B. Sun, *Adv. Sci.*, 2020, **7**, 2000747.
- 7 Y. Liu, W. Duan, H. Pei, P. Sun, Y. Sun, Y. Zhuang and Z. Li, *ACS Appl. Energy Mater.*, 2023, **6**, 7194–7204.
- 8 J. Chen, B. Huang, R. Cao, L. Li, X. Tang, B. Wu, Y. Wu, T. Hu, K. Yuan and Y. Chen, *Adv. Funct. Mater.*, 2023, **33**, 2209315.
- 9 J. Gautam, D. T. Tran, T. I. Singh, N. H. Kim and J. H. Lee, *J. Power Sources*, 2019, **427**, 91–100.
- 10 J. Cai, H. Liu, Y. Luo, Y. Xiong, L. Zhang, S. Wang, K. Xiao and Z.-Q. Liu, *J. Energy Chem.*, 2022, **74**, 420–428.
- 11 Z. Chen, R. Liu, S. Liu, J. Huang, L. Chen, R. Nadimicherla, D. Wu and R. Fu, *Chem. Commun.*, 2020, **56**, 12921–12924.
- 12 H. Xu, D. Wang, P. Yang, A. Liu, R. Li, L. Xiao, J. Zhang, Z. Qu and M. An, *Sustain. Energy Fuels*, 2021, **5**, 2695–2703.
- 13 R. Jiang, X. Chen, J. Deng, T. Wang, K. Wang, Y. Chen and J. Jiang, *J. Energy Chem.*, 2020, **47**, 79–85.
- 14 X. Cui, L. Gao, S. Lei, S. Liang, J. Zhang, C. D. Sewell, W. Xue, Q. Liu, Z. Lin and Y. Yang, *Adv. Funct. Mater.*, 2021, **31**, 2009197.
- 15 H. Wang, F. Yin, N. Liu, R. Kou, X. He, C. Sun, B. Chen, D. Liu and H. Yin, *Adv. Funct. Mater.*, 2019, **29**, 1901531.
- 16 X. Cheng, J. Yang, W. Yan, Y. Han, X. Qu, S. Yin, C. Chen, R. Ji, Y. Li, G. Li, G. Li, Y. Jiang and S. Sun, *Energy Environ. Sci.*, 2021, **14**, 5958–5967.
- 17 C. Xu, C. Guo, J. Liu, B. Hu, J. Dai, M. Wang, R. Jin, Z. Luo, H. Li and C. Chen, *Energy Storage Mater.*, 2022, **51**, 149–158.
- 18 G. Chen, P. Liu, Z. Liao, F. Sun, Y. He, H. Zhong, T. Zhang, E. Zschech, M. Chen, G. Wu, J. Zhang and X. Feng, *Adv. Mater.*, 2020, **32**, 1907399.
- 19 L. Gao, X. Gao, P. Jiang, C. Zhang, H. Guo and Y. Cheng, *Small*, 2022, **18**,

- 2105892.
- 20 W. Zhai, S. Huang, C. Lu, X. Tang, L. Li, B. Huang, T. Hu, K. Yuan, X. Zhuang and Y. Chen, *Small*, 2022, **18**, 2107225.
  - 21 F. Zhou, P. Yu†, F. Sun, G. Zhang, X. Liu and L. Wang, *J. Mater. Chem. A*, 2021, **9**, 6831–6840.
  - 22 M. Cao, Y. Liu, K. Sun, H. Li, X. Lin, P. Zhang, L. Zhou, A. Wang, S. Mehdi, X. Wu, J. Jiang and B. Li, *Small*, 2022, **18**, 2202014.
  - 23 X. Yang, X. Zheng, H. Li, B. Luo, Y. He, Y. Yao, H. Zhou, Z. Yan, Y. Kuang and Z. Huang, *Adv. Funct. Mater.*, 2022, **32**, 2200397.
  - 24 X. Li, D. Liu, Q. Liu and Z. Xiang, *Small*, 2022, **18**, 2201197.
  - 25 L. Lin, P. Xue, X. Cui, J. Liu, J. Liu, M. Tang and Z. Wang, *J. Alloys Compd.*, 2022, **909**, 164625.
  - 26 Z. Jin, J. Lyu, K. Hu, Z. Chen, G. Xie, X. Liu, X. Lin and H. Qiu, *Small*, 2022, **18**, 2107207.
  - 27 C. Li, M. Wu and R. Liu, *Appl. Catal. B Environ.*, 2019, **244**, 150–158.
  - 28 C. Zhao, J. Liu, J. Wang, D. Ren, J. Yu, X. Chen, B. Li and Q. Zhang, *Adv. Mater.*, 2021, **33**, 2008606.
  - 29 K. Srinivas, Z. Chen, F. Ma, A. Chen, Z. Zhang, Y. Wu, M. Zhu and Y. Chen, *Appl. Catal. B Environ.*, 2023, **335**, 122887.
  - 30 P. Wang, Y. Lin, L. Wan and B. Wang, *ACS Appl. Mater. Interfaces*, 2019, **11**, 37701–37707.
  - 31 H. Shang, W. Sun, R. Sui, J. Pei, L. Zheng, J. Dong, Z. Jiang, D. Zhou, Z. Zhuang, W. Chen, J. Zhang, D. Wang and Y. Li, *Nano Lett.*, 2020, **20**, 5443–5450.
  - 32 T. Liu, F. Yang, G. Cheng and W. Luo, *Small*, 2018, **14**, 1703748.
  - 33 K. Srinivas, Z. Chen, A. Chen, F. Ma, M. Zhu and Y. Chen, *J. Energy Chem.*, 2024, **90**, 565–577.
  - 34 K. Wan, J. Luo, X. Zhang, C. Zhou, J. W. Seo, P. Subramanian, J. Yan and J. Fransaer, *J. Mater. Chem. A*, 2019, **7**, 19889–19897.
  - 35 T. Zhang, J. Bian, Y. Zhu and C. Sun, *Small*, 2021, **17**, 2103737.
  - 36 Y. Chen, X. Kong, Y. Wang, H. Ye, J. Gao, Y. Qiu, S. Wang, W. Zhao, Y. Wang, J. Zhou and Q. Yuan, *Chem. Eng. J.*, 2023, **454**, 140512.
  - 37 Y. W. Li, W. J. Zhang, J. Li, H. Y. Ma, H. M. Du, D. C. Li, S. N. Wang, J. S. Zhao, J. M. Dou and L. Xu, *ACS Appl. Mater. Interfaces*, 2020, **12**, 44710–44719.
  - 38 W. Yang, J. Guo, J. Ma, N. Wu, J. Xiao and M. Wu, *J. Alloys Compd.*, 2022, **926**, 166937.
  - 39 L. Zhong, C. Jiang, M. Zheng, X. Peng, T. Liu, S. Xi, X. Chi, Q. Zhang, L. Gu, S. Zhang, G. Shi, L. Zhang, K. Wu, Z. Chen, T. Li, M. Dahbi, J. Alami, K. Amine and J. Lu, *ACS Energy Lett.*, 2021, **6**, 3624–3633.

- 40 H. Jiang, Y. Yao, Y. Zhu, Y. Liu, Y. Su, X. Yang and C. Li, *ACS Appl. Mater. Interfaces*, 2015, **7**, 21511–21520.
- 41 S. Chang, H. Zhang and Z. Zhang, *J. Energy Chem.*, 2021, **56**, 64–71.
- 42 L. Yang, S. Feng, G. Xu, B. Wei and L. Zhang, *ACS Sustain. Chem. Eng.*, 2019, **7**, 5462–5475.
